# Supplementary material
Source: PubMed Central journal article supplement (PMC7486338)
Supplement: mmc1.pdf [file mmc1.pdf]

## COVID-19 and ESRD: Entering a New Era of Uncertainty

### Supplemental References

- S1. Li J and Xu G. Lessons from the Experience in Wuhan to Reduce Risk of COVID-19 Infection in Patients Undergoing Long-Term Hemodialysis. *Clin J Am Soc Nephrol*. 2020;15: 717-719.
- S2. Burgner A, Ikizler TA, Dwyer JP, COVID-19 and the Inpatient Dialysis Unit: Managing Resources during Contingency Planning Pre-Crisis. *Clin J Am Soc Nephrol*; 2020;15: 720-722.
- S3. Division of Nephrology, Columbia University Vagelos College of Physicians Working Group. Disaster Response to the COVID-10 Pandemic for Patients with Kidney Disease in New York City. *J Am Soc Nephrol*.2020;31: 1371-1379.
- S4. Goldfarb DS, Benstein JA, Zhdanova O, Hammer E, Block CA, Caplin NJ, Thompson N and Charytan DM. Impending Shortages of Kidney Replacement Therapy for COVID-19 Patients. *Clin J Am Soc Nephrol*.2020;15: 880-882.
- S5. Hirsch JS, Ng JH, Ross DW et al, on behalf of the Northwell COVID-19 Research Consortium and the Northwell Nephrology COVID-19 Research Consortium. Acute Kidney Injury in Patients Hospitalized with COVID-19. *Kidney Inter*. 2020;98; 209-218.
- S6. Shankaranarayanan D, Neupane S, Verma E, et al. Peritoneal Dialysis of Acute Kidney Injury During the COVID-19 Pandemic in New York City. *Kidney Inter Rep*. 2020;5: in press.
